# Supplementary material for: A computational framework to study sub-cellular RNA localization
Source: PubMed Central journal article supplement (PMC6214940; doi:10.1038/s41467-018-06868-w), 2018-11-02
Supplement: 41467_2018_6868_MOESM3_ESM.pdf [file 41467_2018_6868_MOESM3_ESM.pdf]

## **Description of Additional Supplementary Files**

File Name: Supplementary Data 1

Description: Sequences of oligonucleotides for all performed smFISH experiments.
